# Supplementary material for: A hydrostable cage-based MOF with open metal sites and Lewis basic sites immobilized in the pore surface for efficient separation and purification of natural gas and C2H2
Source: Royal Society of Chemistry journal article supplement (doi:10.1039/d0dt00402b), 2020-01-01
Supplement: d0dt00402b1.pdf [file d0dt00402b1.pdf]

**A hydrostable cage-based MOF with open metal sites and Lewis basic sites immobilized in pore surface for efficient separation and purification of natural gas and C<sub>2</sub>H<sub>2</sub>**

Zhenzhen Jiang, Ying Zou, Tingting Xu, Lihui Fan, Ping Zhou, and Yabing He\*

Key Laboratory of the Ministry of Education for Advanced Catalysis Materials,  
College of Chemistry and Life Sciences, Zhejiang Normal University, Jinhua 321004,  
China. E-mail: heyabing@zjnu.cn

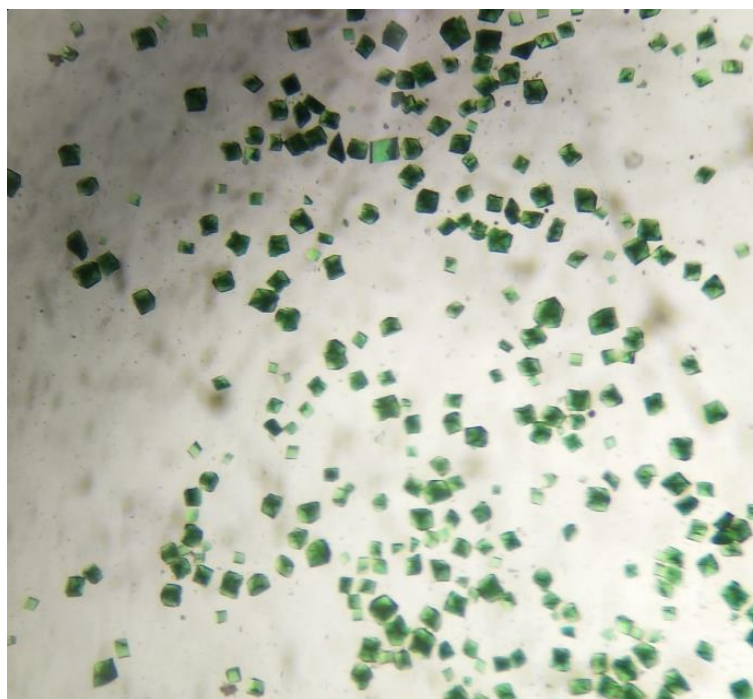

**Fig. S1** The electronic photograph of as-synthesized ZJNU-15.

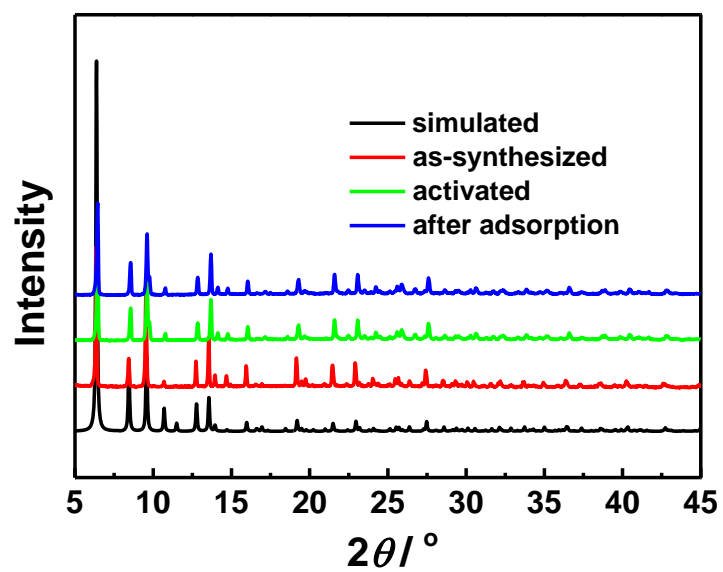

**Fig. S2** Comparison of experimental and simulated PXRD patterns of ZJNU-15.

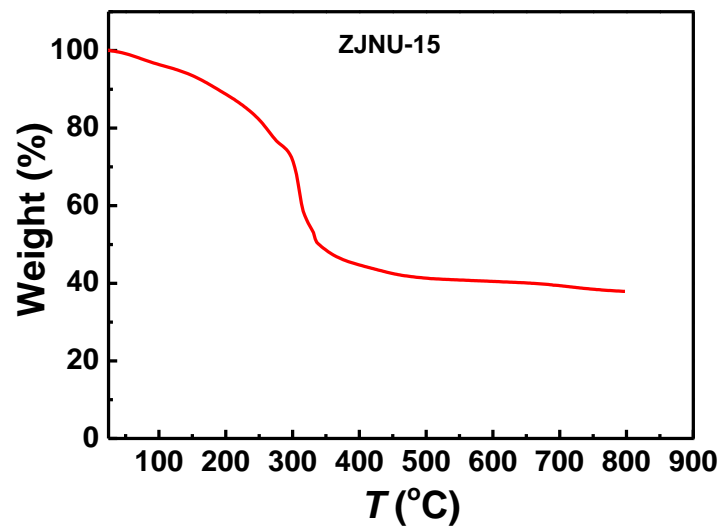

**Fig. S3** TGA profile of as-synthesized **ZJNU-15** under N<sub>2</sub> atmosphere.

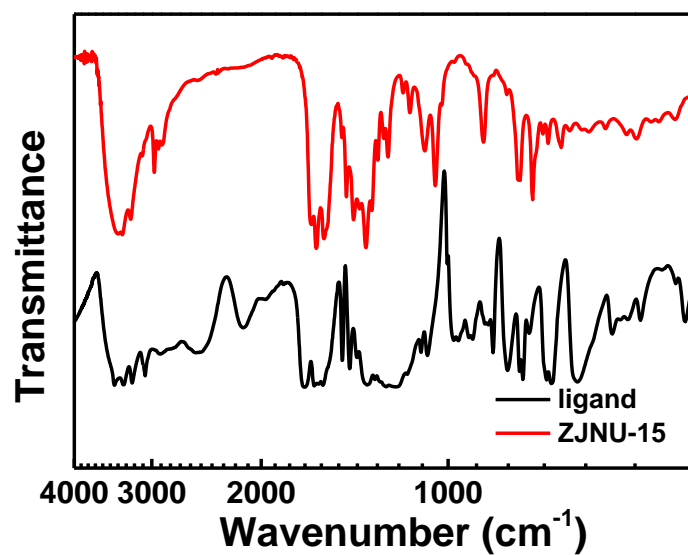

**Fig. S4** Comparison of FTIR spectra of as-synthesized **ZJNU-15** and its organic ligand

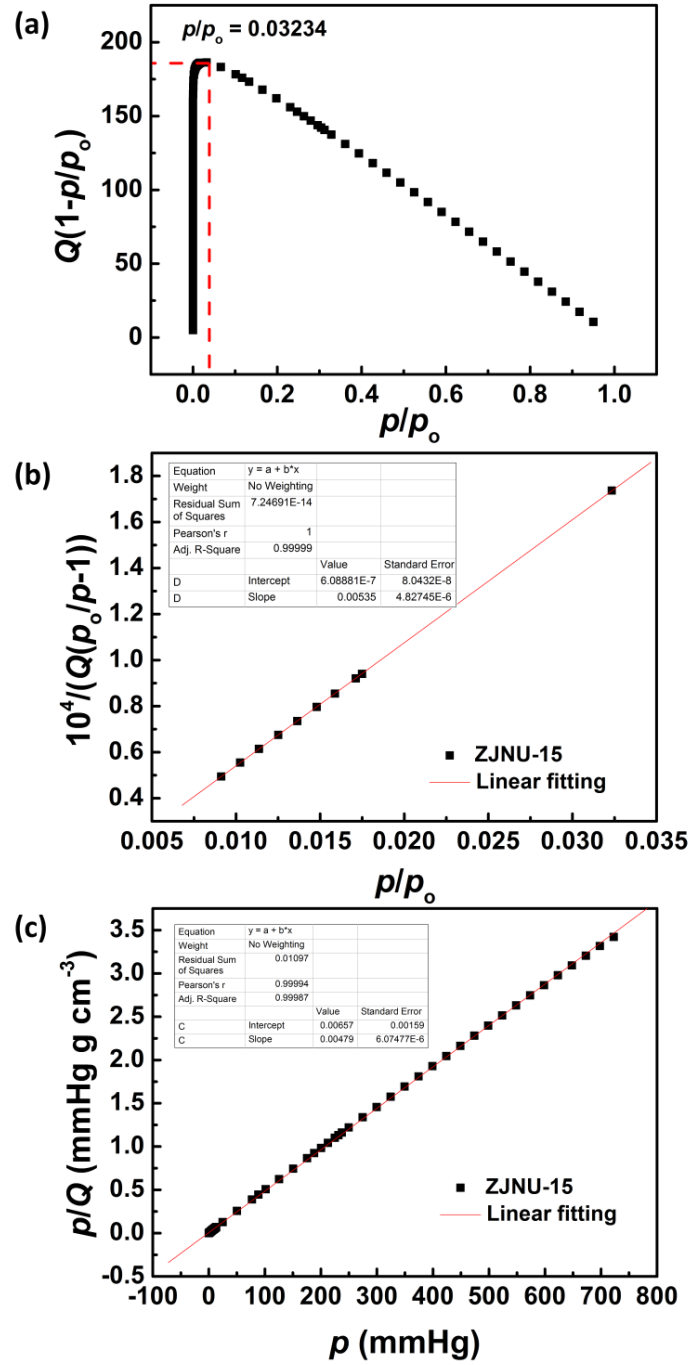

$$S_{\text{BET}} = 1/(6.08881 \times 10^{-7} + 0.00535)/22414 \times 6.023 \times 10^{23} \times 0.162 \times 10^{-18} = 814 \text{ m}^2 \text{ g}^{-1}$$

$$S_{\text{Langmuir}} = (1/0.00479)/22414 \times 6.023 \times 10^{23} \times 0.162 \times 10^{-18} = 909 \text{ m}^2 \text{ g}^{-1}$$

$$\text{BET constant } C = 1 + 0.00535/6.08881 \times 10^{-7} = 8788$$

$$(p/p_o)_{n_m} = \frac{1}{\sqrt{C+1}} = 0.010555$$

**Fig. S5** The consistency plot (a), BET surface area plot (b), and Langmuir surface area plot (c) for ZJNU-15.

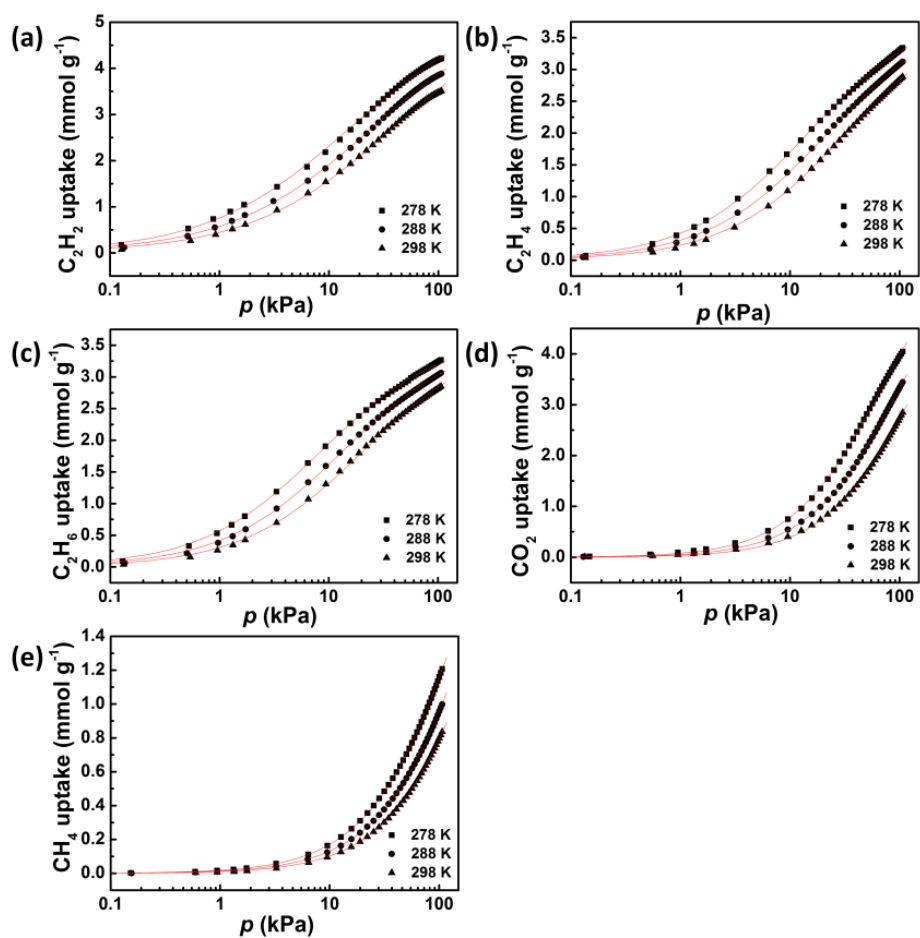

**Fig. S6** Comparison of the pure-component isotherm data for (a) C<sub>2</sub>H<sub>2</sub>, (b) C<sub>2</sub>H<sub>4</sub>, (c) C<sub>2</sub>H<sub>6</sub>, (d) CO<sub>2</sub>, and (e) CH<sub>4</sub> in ZJNU-15 with the fitted isotherms at 278 K, 288 K, and 298 K.

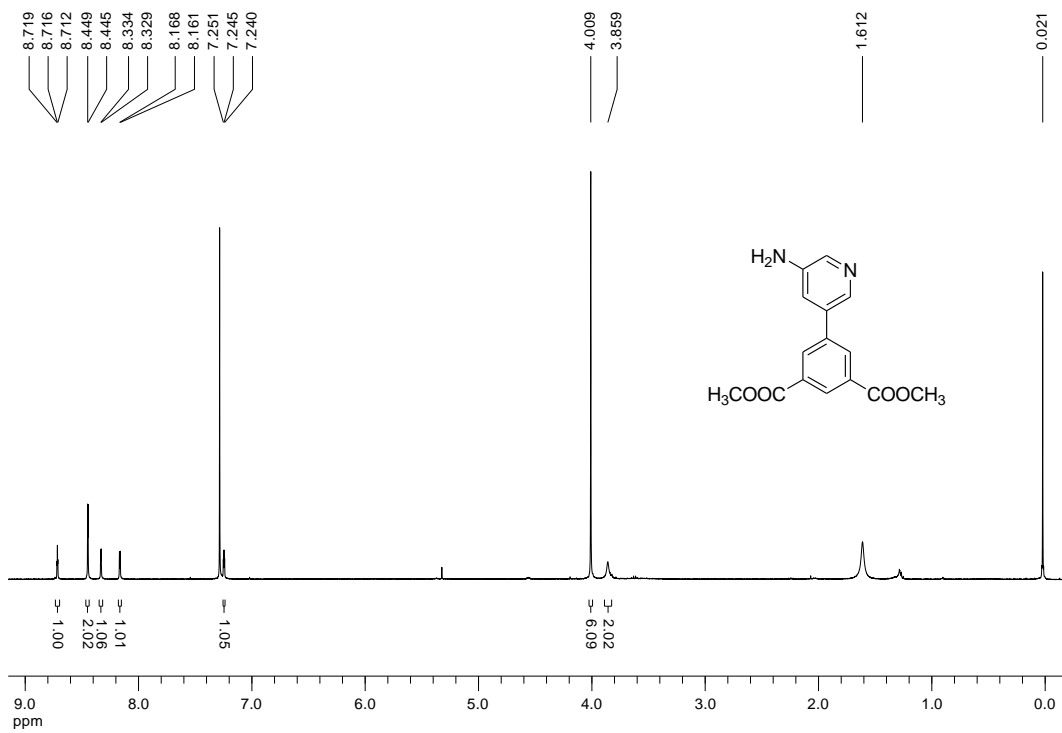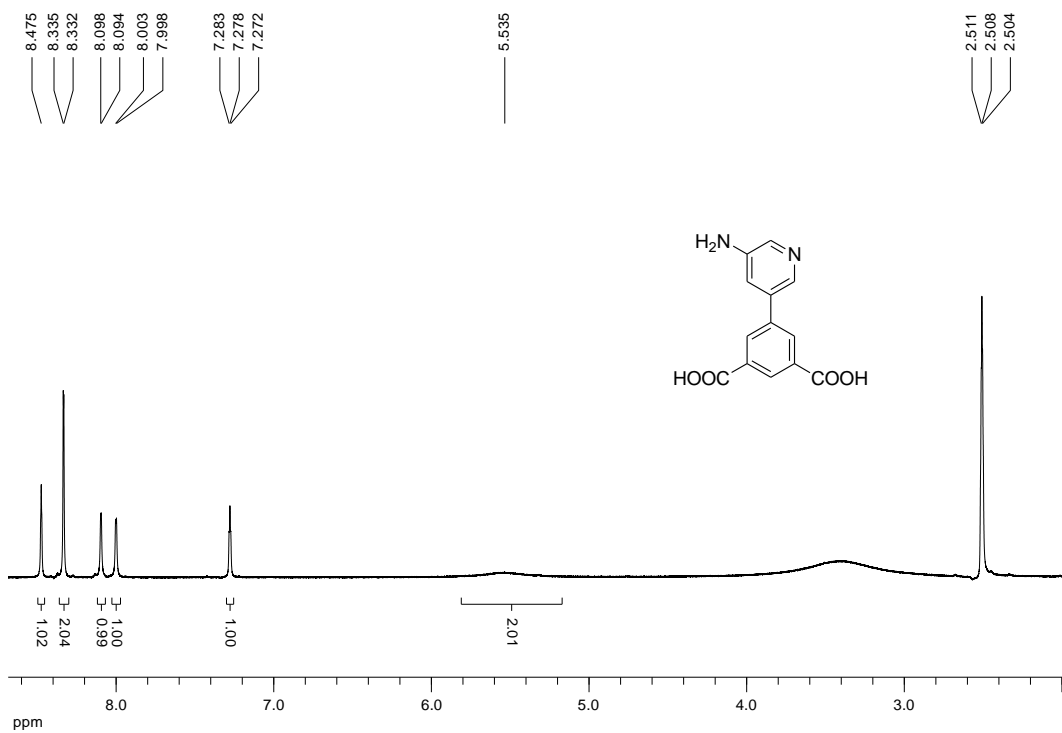

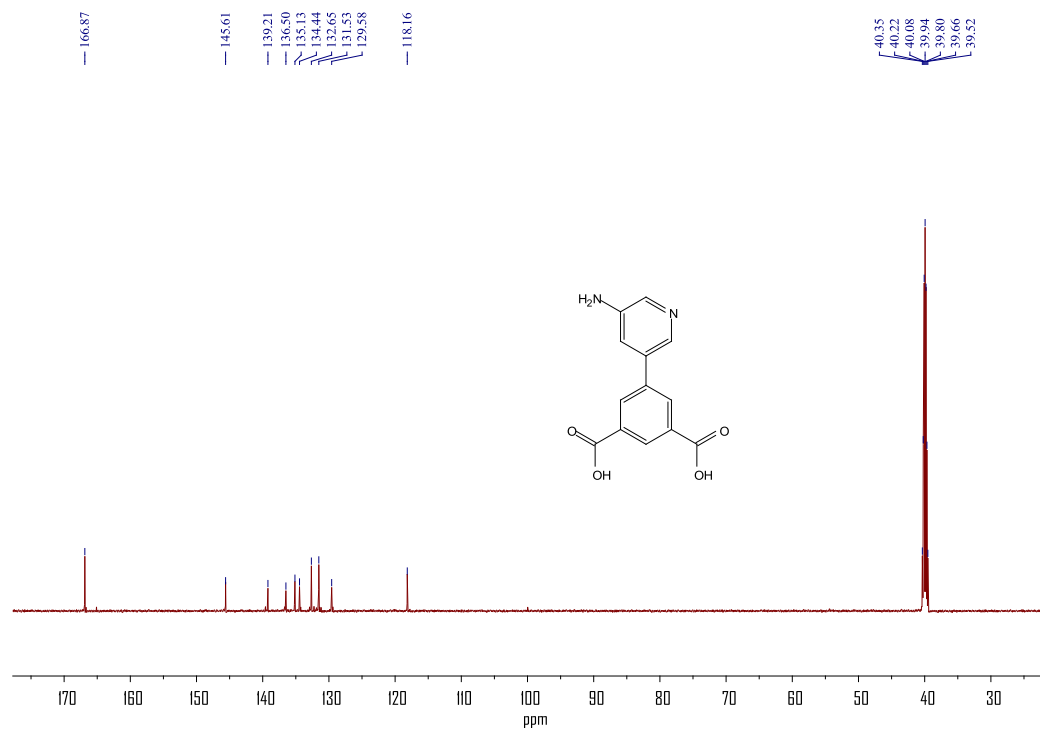

**Fig. S7**  $^1\text{H}$  and  $^{13}\text{C}$  NMR spectra

**Table S1** Summary of physical parameters of C<sub>2</sub>H<sub>2</sub>, C<sub>2</sub>H<sub>4</sub>, C<sub>2</sub>H<sub>6</sub>, CO<sub>2</sub>, and CH<sub>4</sub>

| Adsorbates                    | BP<br>(K) | $T_c$<br>(K) | $p_c$<br>(bar) | Kinetic<br>diameter<br>(Å) | Molecular<br>dimension<br>(Å) | Polarizability<br>( $\times 10^{25}$ cm <sup>3</sup> ) | Dipole moment<br>( $\times 10^{18}$ esu cm) | Quadruple<br>moment<br>( $\times 10^{26}$ esu cm <sup>2</sup> ) |
|-------------------------------|-----------|--------------|----------------|----------------------------|-------------------------------|--------------------------------------------------------|---------------------------------------------|-----------------------------------------------------------------|
| C <sub>2</sub> H <sub>2</sub> | 188.40    | 308.30       | 61.14          | 3.3                        | 3.3×3.3×5.7                   | 33.3-39.3                                              | 0                                           | +7.5                                                            |
| C <sub>2</sub> H <sub>4</sub> | 169.42    | 282.34       | 50.41          | 4.163                      | 3.3×4.2×4.8                   | 42.52                                                  | 0                                           | +1.50                                                           |
| C <sub>2</sub> H <sub>6</sub> | 184.55    | 305.32       | 48.72          | 4.443                      | 3.8×4.1× 4.8                  | 44.4-44.7                                              | 0                                           | +0.65                                                           |
| CO <sub>2</sub>               | 216.55    | 304.12       | 73.74          | 3.3                        | 3.2×3.3×5.4                   | 29.11                                                  | 0                                           | -4.3                                                            |
| CH <sub>4</sub>               | 111.66    | 190.56       | 45.99          | 3.758                      | 3.7×3.7×3.7                   | 25.93                                                  | 0                                           | 0                                                               |

BP: normal boiling point;  $T_c$ : critical temperature;  $p_c$ : critical pressure



**Table S2** Crystal data and structure refinement for **ZJNU-15**.

| MOF                                                           | ZJNU-15                                                                                                                              |
|---------------------------------------------------------------|--------------------------------------------------------------------------------------------------------------------------------------|
| Empirical formula                                             | $C_{49.50}H_{50.50}Cu_4N_{9.50}O_{17.50}$                                                                                            |
| Formula weight                                                | 1312.65                                                                                                                              |
| Temperature (K)                                               | 150(2)                                                                                                                               |
| $\lambda$ (Å)                                                 | 0.71073                                                                                                                              |
| Crystal system                                                | Trigonal                                                                                                                             |
| Space group                                                   | $R\bar{3}c:H$                                                                                                                        |
| Unit cell dimensions                                          | $a = 18.4889(6)$ Å<br>$b = 18.4889(6)$ Å<br>$c = 55.2602(18)$ Å<br>$\alpha = 90^\circ$<br>$\beta = 90^\circ$<br>$\gamma = 120^\circ$ |
| $V$ (Å <sup>3</sup> )                                         | 16359.3(12)                                                                                                                          |
| $Z$                                                           | 12                                                                                                                                   |
| $D_c$ (g cm <sup>-3</sup> )                                   | 1.599                                                                                                                                |
| $\mu$ (mm <sup>-1</sup> )                                     | 1.619                                                                                                                                |
| $F(000)$                                                      | 8040                                                                                                                                 |
| $\theta$ range for data collection (°)                        | 2.465 to 27.486                                                                                                                      |
| Limiting indices                                              | $-24 \leq h \leq 24$<br>$-23 \leq k \leq 24$<br>$-71 \leq l \leq 70$                                                                 |
| Reflections collected / unique                                | 46837 / 4170                                                                                                                         |
| $R_{int}$                                                     | 0.0379                                                                                                                               |
| Max. and min. transmission                                    | 0.851 and 0.823                                                                                                                      |
| Refinement method                                             | Full-matrix least-squares on $F^2$                                                                                                   |
| Data/restraints/parameters                                    | 4170 / 0 / 190                                                                                                                       |
| Goodness-of-fit on $F^2$                                      | 1.004                                                                                                                                |
| Final $R$ indices [ $I > 2\sigma(I)$ ]                        | $R_1 = 0.0458$<br>$wR_2 = 0.2036$                                                                                                    |
| $R$ indices (all data)                                        | $R_1 = 0.0495$<br>$wR_2 = 0.2129$                                                                                                    |
| Largest diff. peak and hole (e <sup>-</sup> Å <sup>-3</sup> ) | 0.949 and -3.245                                                                                                                     |
| CCDC                                                          | 1981353                                                                                                                              |

**Table S3** Langmuir-Freundlich fitting parameters for adsorption of C<sub>2</sub>H<sub>2</sub>, C<sub>2</sub>H<sub>4</sub>, C<sub>2</sub>H<sub>6</sub>, CO<sub>2</sub>, and CH<sub>4</sub> in **ZJNU-15**.

| Adsorbates                    | $q_{\text{sat}}$<br>(mmol g <sup>-1</sup> ) | $b_0$<br>(kPa) <sup>-<math>\nu</math></sup> | $E$<br>(kJ mol <sup>-1</sup> ) | $\nu$   | $R^2$   |
|-------------------------------|---------------------------------------------|---------------------------------------------|--------------------------------|---------|---------|
| C <sub>2</sub> H <sub>2</sub> | 5.43508                                     | $2.148 \times 10^{-5}$                      | 20.64                          | 0.66069 | 0.99944 |
| C <sub>2</sub> H <sub>4</sub> | 3.98376                                     | $9.18412 \times 10^{-6}$                    | 21.89                          | 0.79632 | 0.99976 |
| C <sub>2</sub> H <sub>6</sub> | 3.64972                                     | $5.45569 \times 10^{-6}$                    | 24.11                          | 0.78982 | 0.9995  |
| CO <sub>2</sub>               | 6.60789                                     | $1.37095 \times 10^{-7}$                    | 26.32                          | 1.04849 | 0.99984 |
| CH <sub>4</sub>               | 3.35002                                     | $2.00532 \times 10^{-6}$                    | 18.28                          | 0.99161 | 0.99995 |

**Table S4** Summary of gas adsorption properties of **ZJNU-15**

| <b>ZJNU-15</b>                                                          |                                                | 298 K | 288 K | 278 K |
|-------------------------------------------------------------------------|------------------------------------------------|-------|-------|-------|
| Uptake capacity <sup>a</sup><br>(cm <sup>3</sup> g <sup>-1</sup> , STP) | C <sub>2</sub> H <sub>2</sub>                  | 78.7  | 87.1  | 94.5  |
|                                                                         | C <sub>2</sub> H <sub>4</sub>                  | 64.7  | 70.0  | 74.9  |
|                                                                         | C <sub>2</sub> H <sub>6</sub>                  | 63.9  | 68.7  | 73.3  |
|                                                                         | CO <sub>2</sub>                                | 63.8  | 77.2  | 90.7  |
|                                                                         | CH <sub>4</sub>                                | 18.7  | 22.4  | 27.1  |
| IAST adsorption selectivity <sup>a</sup>                                | C <sub>2</sub> H <sub>2</sub> /CH <sub>4</sub> | 37.7  | 46.9  | 60.9  |
|                                                                         | C <sub>2</sub> H <sub>4</sub> /CH <sub>4</sub> | 17.7  | 19.9  | 22.9  |
|                                                                         | C <sub>2</sub> H <sub>6</sub> /CH <sub>4</sub> | 23.2  | 26.9  | 31.9  |
|                                                                         | CO <sub>2</sub> /CH <sub>4</sub>               | 5.0   | 5.9   | 7.3   |
|                                                                         | C <sub>2</sub> H <sub>2</sub> /CO <sub>2</sub> | 4.4   | 4.2   | 4.1   |
|                                                                         | C <sub>2</sub> H <sub>4</sub> /CO <sub>2</sub> | 2.5   | 2.3   | 2.0   |
|                                                                         | C <sub>2</sub> H <sub>6</sub> /CO <sub>2</sub> | 3.0   | 2.8   | 2.6   |
| $Q_{st}^b$<br>(kJ mol <sup>-1</sup> )                                   | C <sub>2</sub> H <sub>2</sub>                  | 33.6  |       |       |
|                                                                         | C <sub>2</sub> H <sub>4</sub>                  | 28.4  |       |       |
|                                                                         | C <sub>2</sub> H <sub>6</sub>                  | 30.5  |       |       |
|                                                                         | CO <sub>2</sub>                                | 23.4  |       |       |
|                                                                         | CH <sub>4</sub>                                | 21.0  |       |       |

<sup>a</sup> at 1 atm; <sup>b</sup> at near zero surface coverage
